# Supplementary material for: Structure Characterization of [N-Phenylamino(2-boronphenyl)-R-methyl]phosphonic Acid by Vibrational Spectroscopy and Density Functional Theory Calculations
Source: Hindawi journal article supplement (doi:10.1155/2014/247237), 2014-01-01
Supplement: f1 [file 247237.f1.pdf]

## Supporting Information

### Structure characterization of [*N*-phenylamino(2-boronphenyl)-*R*-methyl]phosphonic acid by vibrational spectroscopy and density functional theory calculations

*Natalia Piergies,<sup>a</sup> Edyta Proniewicz,<sup>a,b\*</sup> Leonard M. Proniewicz<sup>a,d</sup>*

<sup>a</sup>Faculty of Chemistry, Jagiellonian University, ul. Ingardena 3, 30-060 Krakow, Poland

<sup>b</sup>Faculty of Foundry Engineering, AGH University of Science and Technology, ul. Reymonta 23,  
30-059 Krakow, Poland

<sup>d</sup>The State Higher Vocational School, ul. Mickiewicza 8, 33-100 Tarnów, Poland

\*Correspondence to: E.P. (e-mail: [podstawk@chemia.uj.edu.pl](mailto:podstawk@chemia.uj.edu.pl); Phone: +48-12-663-2077. Fax: +48-12-634-0515)

**Table 2** The calculated wavenumbers and potential energy distribution (PED, %) for the FT-Raman and FT-IR spectra of [PhN-(2-PhB(OH)<sub>2</sub>)-R-Me]PO<sub>3</sub>H<sub>2</sub><sup>a</sup>

| wavenumbers / cm <sup>-1</sup> |            |         |                                                                                                                                                                       |
|--------------------------------|------------|---------|-----------------------------------------------------------------------------------------------------------------------------------------------------------------------|
| Calc.                          | Exp.       |         | Assignment                                                                                                                                                            |
|                                | FT – Raman | FT – IR |                                                                                                                                                                       |
| 412                            |            |         | $\delta_p(\text{bridge})(35)$ , $\gamma_s(\text{bridge})$ , $\gamma_{as}(\text{bridge})$                                                                              |
| 412                            |            |         | $\delta_{as}(\text{PO}_3)(37)$ , $\gamma_{as}(\text{bridge})$ , $\gamma_s(\text{bridge})$ , $\delta_p(\text{bridge})$                                                 |
| 415                            |            |         | $\gamma_{as}(\phi)(58)$ , $\gamma_{as}(\text{bridge})$ , $\gamma_s(\text{bridge})$                                                                                    |
| 415                            |            |         | $\gamma_{as}(\phi)(68)$ , $\delta_{as}(\text{PO}_3)$                                                                                                                  |
| 417                            |            |         | $\delta_{as}(\text{PO}_3)(26)$ , $\gamma_{as}(\text{bridge})$ , $\gamma_{as}(\phi)$ , $\gamma_s(\text{bridge})$ , $\delta_p(\text{bridge})$                           |
| 420                            |            |         | $\delta_p(\text{bridge})(38)$ , $\gamma_s(\text{bridge})$ , $\gamma_{as}(\text{bridge})$                                                                              |
| 449                            | 432        | 430     | $\gamma_{as}(\phi)_B(31)$ , $\delta_{oop}(\text{CC}_L(\text{C}_a)\text{C})_{\phi B}$ , $\delta_s(\text{C}_a\text{PO}_3)$ , $\delta_p(\text{bridge})$                  |
| 451                            | 474        |         | $\gamma_{as}(\phi)_B(29)$ , $\delta_{oop}(\text{CC}_L(\text{C}_a)\text{C})_{\phi B}$ , $\delta_s(\text{C}_a\text{PO}_3)$ , $\gamma_{as}(\text{bridge})$               |
| 498                            |            |         | $\gamma_{as}(\text{bridge})(39)$ , $\gamma_s(\text{bridge})$ , $\delta_p(\text{bridge})$                                                                              |
| 499                            | 490        | 491     | $\delta_p(\text{bridge})$ , $\gamma_s(\text{bridge})$ , $\gamma_{as}(\text{bridge})$ , $\delta_{oop}(\text{CC}_L(\text{C}_a)\text{C})_{\phi B}$                       |
| 516                            |            |         | $\delta_{oop}(\text{CC}_L(\text{N})\text{C})_{\phi}(22)$ , $\gamma_{as}(\phi)$ , $\gamma_{as}(\text{bridge})$ , $\gamma_s(\text{bridge})$                             |
| 517                            |            |         | $\delta_{oop}(\text{CC}_L(\text{N})\text{C})_{\phi}(22)$ , $\gamma_{as}(\phi)$ , $\delta_p(\text{bridge})$ , $\gamma_s(\text{bridge})$ , $\gamma_{as}(\text{bridge})$ |
| 522                            |            |         | $\gamma_{as}(\text{bridge})(45)$ , $\gamma_s(\text{bridge})$ , $\delta_p(\text{bridge})$                                                                              |
| 531                            |            | 533     | $\delta_p(\text{bridge})$ , $\gamma_s(\text{bridge})$ , $\gamma_{as}(\text{bridge})$                                                                                  |

|     |     |     |                                                                                                                                                                                                                   |
|-----|-----|-----|-------------------------------------------------------------------------------------------------------------------------------------------------------------------------------------------------------------------|
| 539 |     |     | $\delta_{\text{oop}}(\text{CLC}_{\text{B}(\text{OH})_2(\text{B})\text{C}})_{\phi\text{B}}(30), \gamma_{\text{as}}(\phi)_{\text{B}}, \delta_{\text{p}}(\text{bridge})$                                             |
| 541 |     |     | $\gamma_{\text{as}}(\phi)_{\text{B}}(31), \delta_{\text{oop}}(\text{C}_{\text{L}}\text{C}_{\text{B}(\text{OH})_2(\text{B})\text{C}})_{\phi\text{B}}$                                                              |
| 553 | 543 |     | $\delta_{\text{p}}(\text{bridge})(48), \gamma_{\text{s}}(\text{bridge}), \gamma_{\text{as}}(\text{bridge})$                                                                                                       |
| 563 |     |     | $\gamma_{\text{as}}(\text{bridge})(27), \gamma_{\text{s}}(\text{bridge}), \delta_{\text{p}}(\text{bridge}), \gamma_{\text{as}}(\phi)_{\text{B}}$                                                                  |
| 574 |     |     | $\delta_{\text{p}}(\text{bridge})(49), \gamma_{\text{s}}(\text{bridge}), \gamma_{\text{as}}(\text{bridge})$                                                                                                       |
| 579 |     |     | $\delta_{\text{as}}(\phi)(26), \gamma_{\text{as}}(\text{bridge}), \gamma_{\text{s}}(\text{bridge})$                                                                                                               |
| 581 | 591 | 591 | $\delta_{\text{p}}(\text{bridge})(36), \gamma_{\text{s}}(\text{bridge}), \gamma_{\text{as}}(\text{bridge})$                                                                                                       |
| 599 |     |     | $\gamma_{\text{as}}(\text{bridge})(50), \gamma_{\text{s}}(\text{bridge}), \delta_{\text{p}}(\text{bridge})$                                                                                                       |
| 616 |     |     | $\delta_{\text{oop}}(\text{CBO}_2)(36), \gamma_{\text{as}}(\text{bridge}), \gamma_{\text{s}}(\text{bridge}), \delta_{\text{p}}(\text{bridge})$                                                                    |
| 618 |     |     | $\delta_{\text{oop}}(\text{CBO}_2)(44), \gamma_{\text{as}}(\text{bridge}), \gamma_{\text{s}}(\text{bridge})$                                                                                                      |
| 627 | 617 | 617 | $\delta_{\text{as}}(\phi)(34), \delta_{\text{oop}}(\text{CBO}_2), \gamma_{\text{as}}(\text{bridge}), \gamma_{\text{s}}(\text{bridge})$                                                                            |
| 628 |     |     | $\delta_{\text{oop}}(\text{CBO}_2)(38), \delta_{\text{as}}(\phi), \gamma_{\text{as}}(\text{bridge})$                                                                                                              |
| 659 | 635 | 636 | $\delta_{\text{p}}(\text{bridge})(25), \gamma_{\text{as}}(\text{bridge}), \gamma_{\text{s}}(\text{bridge})$                                                                                                       |
| 660 |     |     | $\delta_{\text{oop}}(\text{CBO}_2)(18), \gamma_{\text{as}}(\text{bridge}), \delta_{\text{as}}(\phi)_{\text{B}}, \delta(\text{C}_{\text{L}}\text{C}_{\alpha}(\text{P})\text{N}), \gamma_{\text{s}}(\text{bridge})$ |
| 696 |     | 688 | $\delta_{\text{p}}(\text{bridge})(46), \gamma_{\text{s}}(\text{bridge}), \gamma_{\text{as}}(\text{bridge})$                                                                                                       |
| 697 |     |     | $\gamma_{\text{as}}(\text{bridge})(34), \gamma_{\text{s}}(\text{bridge}), \delta_{\text{p}}(\text{bridge})$                                                                                                       |
| 699 |     |     | $\delta_{\text{p}}(\phi)(54), \delta_{\text{oop}}(\text{CC}(\text{H})\text{C})_{\phi}, \delta_{\text{p}}(\text{bridge})$                                                                                          |
| 699 |     |     | $\delta_{\text{p}}(\phi)(25), \gamma_{\text{as}}(\text{bridge}), \gamma_{\text{s}}(\text{bridge}), \delta_{\text{p}}(\text{bridge})$                                                                              |
| 717 |     | 710 | $\gamma_{\text{as}}(\text{bridge})(32), \gamma_{\text{s}}(\text{bridge}), \delta_{\text{p}}(\text{bridge})$                                                                                                       |
| 720 | 722 |     | $\delta_{\text{p}}(\text{bridge})(49), \gamma_{\text{s}}(\text{bridge}), \gamma_{\text{as}}(\text{bridge})$                                                                                                       |

|     |     |     |                                                                                                                                                                                                                                  |
|-----|-----|-----|----------------------------------------------------------------------------------------------------------------------------------------------------------------------------------------------------------------------------------|
| 728 |     |     | $\gamma(\text{C}_\alpha\text{PO}_3\text{H})(23), \gamma_{\text{as}}(\text{bridge}), \gamma_{\text{s}}(\text{bridge}), \delta_{\text{p}}(\text{bridge}), \delta_{\text{p}}(\phi)_{\text{B}}$                                      |
| 732 |     |     | $\delta_{\text{p}}(\text{bridge})(52), \gamma_{\text{s}}(\text{bridge}), \gamma_{\text{as}}(\text{bridge})$                                                                                                                      |
| 742 |     |     | $\gamma_{\text{as}}(\text{bridge})(19), \gamma_{\text{s}}(\text{bridge}), \delta_{\text{p}}(\phi)_{\text{B}}$                                                                                                                    |
| 746 | 745 | 742 | $\delta_{\text{p}}(\text{bridge})(18), \delta_{\text{p}}(\phi)_{\text{B}}, \gamma_{\text{s}}(\text{bridge})$                                                                                                                     |
| 760 |     |     | $\delta_{\text{p}}(\phi)_{\text{B}}(30), \delta_{\text{oop}}(\text{C}_\text{L}\text{C}_\text{B}(\text{OH})_2(\text{B})\text{C})_{\phi\text{B}}$                                                                                  |
| 760 |     |     | $\delta_{\text{p}}(\phi)_{\text{B}}(32), \delta_{\text{oop}}(\text{C}_\text{L}\text{C}_\text{B}(\text{OH})_2(\text{B})\text{C})_{\phi\text{B}}, \delta_{\text{oop}}(\text{CC}(\text{H})\text{C})_{\phi\text{B}}$                 |
| 765 |     |     | $\delta_{\text{p}}(\phi)_{\text{B}}(26), \delta_{\text{oop}}(\text{CC}(\text{H})\text{C})_{\phi}, \delta_{\text{oop}}(\text{C}_\text{L}\text{C}_\text{B}(\text{OH})_2(\text{B})\text{C})_{\phi\text{B}}$                         |
| 768 |     |     | $\delta_{\text{p}}(\text{bridge})(30), \gamma_{\text{s}}(\text{bridge}), \gamma_{\text{as}}(\text{bridge})$                                                                                                                      |
| 791 |     |     | $\gamma_{\text{s}}(\text{bridge})(43), \gamma_{\text{as}}(\text{bridge}), \delta_{\text{s}}(\text{bridge}), \delta_{\text{as}}(\text{bridge})$                                                                                   |
| 793 | 775 | 777 | $\delta_{\text{oop}}(\text{CC}_\text{L}(\text{C}_\alpha)\text{C})_{\phi\text{B}}(36), \delta_{\text{p}}(\phi)_{\text{B}}, \delta_{\text{oop}}(\text{C}_\text{L}\text{C}_\text{B}(\text{OH})_2(\text{B})\text{C})_{\phi\text{B}}$ |
| 794 |     |     | $\delta_{\text{oop}}(\text{CC}_\text{L}(\text{C}_\alpha)\text{C})_{\phi\text{B}}(36), \delta_{\text{p}}(\phi)_{\text{B}}, \delta_{\text{oop}}(\text{C}_\text{L}\text{C}_\text{B}(\text{OH})_2(\text{B})\text{C})_{\phi\text{B}}$ |
| 822 | 808 | 809 | $\delta_{\text{p}}(\text{bridge})(43), \gamma_{\text{s}}(\text{bridge}), \gamma_{\text{as}}(\text{bridge})$                                                                                                                      |
| 823 | 826 | 827 | $\nu(\text{PO})(12), \gamma_{\text{as}}(\text{bridge})$                                                                                                                                                                          |
| 830 |     |     | $\delta_{\text{p}}(\text{bridge})(56), \gamma_{\text{s}}(\text{bridge}), \gamma_{\text{as}}(\text{bridge})$                                                                                                                      |
| 831 |     |     | $\delta_{\text{oop}}(\text{C}_\text{L}\text{C}(\text{H})\text{C})_{\phi}(39), \delta_{\text{oop}}(\text{CC}(\text{H})\text{C})_{\phi}$                                                                                           |
| 838 |     |     | $\delta_{\text{p}}(\text{bridge})(62), \gamma_{\text{s}}(\text{bridge}), \gamma_{\text{as}}(\text{bridge})$                                                                                                                      |
| 843 |     |     | $\nu(\text{PO})(38)$                                                                                                                                                                                                             |
| 852 |     |     | $\delta_{\text{p}}(\text{bridge})(62), \gamma_{\text{s}}(\text{bridge}), \gamma_{\text{as}}(\text{bridge})$                                                                                                                      |
| 878 |     |     | $\delta_{\text{oop}}(\text{C}_\text{L}\text{C}(\text{H})\text{C})_{\phi\text{B}}(12)$                                                                                                                                            |
| 880 |     |     | $\delta_{\text{p}}(\text{bridge})(16), \delta_{\text{oop}}(\text{C}_\text{L}\text{C}(\text{H})\text{C})_{\phi\text{B}}, \delta_{\text{oop}}(\text{C}_\text{B}(\text{OH})_2\text{C}(\text{H})\text{C})_{\phi\text{B}},$           |

|     |      |     |                                                                                                                                                                                                                                                                                                               |
|-----|------|-----|---------------------------------------------------------------------------------------------------------------------------------------------------------------------------------------------------------------------------------------------------------------------------------------------------------------|
|     |      |     | $\gamma_s(\text{bridge})$                                                                                                                                                                                                                                                                                     |
| 883 |      |     | $\delta_{\text{oop}}(\text{C}_\text{L}\text{C}(\text{H})\text{C})_{\phi\text{B}}(14), \delta_{\text{oop}}(\text{CC}_\text{L}(\text{C}_\alpha)\text{C})_{\phi\text{B}},$<br>$\delta_{\text{oop}}(\text{C}_{\text{B}(\text{OH})_2}\text{C}(\text{H})\text{C})_{\phi\text{B}}, \delta_{\text{p}}(\phi)_\text{B}$ |
| 886 | 884  | 882 | $\delta_{\text{p}}(\text{bridge})(35), \gamma_s(\text{bridge}), \gamma_{\text{as}}(\text{bridge})$                                                                                                                                                                                                            |
| 893 |      |     | $\delta_{\text{p}}(\text{bridge})(33), \gamma_s(\text{bridge}), \gamma_{\text{as}}(\text{bridge})$                                                                                                                                                                                                            |
| 893 |      |     | $\delta_{\text{oop}}(\text{C}_\text{L}\text{C}(\text{H})\text{C})_{\phi}(40), \delta_{\text{oop}}(\text{CC}(\text{H})\text{C})_{\phi}$                                                                                                                                                                        |
| 919 | 899  | 903 | $\mathbf{v}(\text{PO})(30), \delta_{\text{oop}}(\text{CC}_\text{L}(\text{C}_\alpha)\text{C})_{\phi\text{B}}$                                                                                                                                                                                                  |
| 924 |      | 924 | $\mathbf{v}(\text{PO})(22), \delta_{\text{p}}(\text{bridge})$                                                                                                                                                                                                                                                 |
| 952 | 934  |     | $\delta_{\text{oop}}(\text{C}_{\text{B}(\text{OH})_2}\text{C}(\text{H})\text{C})_{\phi\text{B}}(27), \delta_{\text{oop}}(\text{C}_\text{L}\text{C}(\text{H})\text{C})_{\phi\text{B}},$<br>$\delta_{\text{oop}}(\text{CC}(\text{H})\text{C})_{\phi\text{B}}, \gamma_{\text{as}}(\phi)_\text{B}$                |
| 952 |      |     | $\delta_{\text{oop}}(\text{C}_{\text{B}(\text{OH})_2}\text{C}(\text{H})\text{C})_{\phi\text{B}}(27), \delta_{\text{oop}}(\text{C}_\text{L}\text{C}(\text{H})\text{C})_{\phi\text{B}},$<br>$\delta_{\text{oop}}(\text{CC}(\text{H})\text{C})_{\phi\text{B}}, \gamma_{\text{as}}(\phi)_\text{B}$                |
| 960 |      |     | $\delta_{\text{oop}}(\text{CC}(\text{H})\text{C})_{\phi}(54), \delta_{\text{oop}}(\text{C}_\text{L}\text{C}(\text{H})\text{C})_{\phi}$                                                                                                                                                                        |
| 960 |      |     | $\delta_{\text{oop}}(\text{CC}(\text{H})\text{C})_{\phi}(51), \delta_{\text{oop}}(\text{C}_\text{L}\text{C}(\text{H})\text{C})_{\phi}$                                                                                                                                                                        |
| 976 |      |     | $\delta_{\text{oop}}(\text{CC}(\text{H})\text{C})_{\phi}(69), \delta_{\text{p}}(\phi), \delta_{\text{oop}}(\text{C}_\text{L}\text{C}(\text{H})\text{C})_{\phi}$                                                                                                                                               |
| 976 |      |     | $\delta_{\text{oop}}(\text{CC}(\text{H})\text{C})_{\phi}(65), \delta_{\text{oop}}(\text{C}_\text{L}\text{C}(\text{H})\text{C})_{\phi}, \delta_{\text{p}}(\phi)$                                                                                                                                               |
| 987 |      |     | $\delta_{\text{oop}}(\text{CC}(\text{H})\text{C})_{\phi\text{B}}(48), \delta_{\text{p}}(\phi)_\text{B}$                                                                                                                                                                                                       |
| 987 | 999  | 983 | $\delta_{\text{oop}}(\text{CC}(\text{H})\text{C})_{\phi\text{B}}(48), \delta_{\text{p}}(\phi)_\text{B}$                                                                                                                                                                                                       |
| 998 |      |     | $\delta_{\text{trig}}(\phi)(36), \rho_{\text{b}}(\text{POH}), \gamma_{\text{as}}(\text{bridge})$                                                                                                                                                                                                              |
| 998 |      |     | $\delta_{\text{p}}(\text{bridge})(46), \gamma_s(\text{bridge}), \gamma_{\text{as}}(\text{bridge})$                                                                                                                                                                                                            |
| 999 | 1008 | 998 | $\delta_{\text{trig}}(\phi)(40), \delta_{\text{p}}(\text{bridge}), \rho_{\text{b}}(\text{POH}), \gamma_s(\text{bridge})$                                                                                                                                                                                      |

|      |      |      |                                                                                                                                                |
|------|------|------|------------------------------------------------------------------------------------------------------------------------------------------------|
| 1000 |      |      | $\rho_b(\text{POH})(36), \delta_{\text{trig}}(\phi), \gamma_{\text{as}}(\text{bridge}), \gamma_s(\text{bridge})$                               |
| 1003 |      |      | $\delta_p(\text{bridge})(51), \gamma_s(\text{bridge}), \gamma_{\text{as}}(\text{bridge})$                                                      |
| 1008 |      |      | $\gamma_{\text{as}}(\text{bridge})(29), \gamma_s(\text{bridge}), \rho_r(\text{BO}(\text{H})\text{H})_{\text{bridge}}, \delta_p(\text{bridge})$ |
| 1036 |      |      | $v(\text{CC})_{\phi}(44), \gamma_{\text{as}}(\text{bridge})$                                                                                   |
| 1036 | 1031 | 1021 | $v(\text{CC})_{\phi}(51)$                                                                                                                      |
| 1045 |      |      | $\gamma_{\text{as}}(\text{bridge})(41), \gamma_s(\text{bridge}), \delta_p(\text{bridge})$                                                      |
| 1045 |      | 1042 | $\delta_p(\text{bridge})(31), v(\text{CC})_{\phi\text{B}}, \gamma_s(\text{bridge}), \gamma_{\text{as}}(\text{bridge})$                         |
| 1064 |      |      | $\gamma_{\text{as}}(\text{bridge})(53), \gamma_s(\text{bridge}), \delta_p(\text{bridge})$                                                      |
| 1077 |      |      | $\delta_p(\text{bridge})(35), \gamma_s(\text{bridge}), \gamma_{\text{as}}(\text{bridge}), \delta_{\text{trig}}(\phi)_{\text{B}}$               |
| 1082 |      |      | $\gamma_{\text{as}}(\text{bridge})(29), v(\text{C}_{\alpha}\text{N}), \gamma_s(\text{bridge}), \delta_p(\text{bridge})$                        |
| 1084 | 1074 | 1073 | $v(\text{C}_{\alpha}\text{N})(14), \delta_p(\text{bridge})$                                                                                    |
| 1106 |      | 1090 | $\gamma_{\text{as}}(\text{bridge})(48), \gamma_s(\text{bridge}), \delta_p(\text{bridge})$                                                      |
| 1108 |      |      | $v(\text{C}_{\alpha}\text{N})(24)$                                                                                                             |
| 1112 |      |      | $\gamma_{\text{as}}(\text{bridge})(51), \gamma_s(\text{bridge}), \delta_p(\text{bridge})$                                                      |
| 1126 |      |      | $\delta_p(\text{bridge})(36), \gamma_s(\text{bridge}), \gamma_{\text{as}}(\text{bridge})$                                                      |
| 1142 |      |      | $\rho_b(\text{POH})(31), \gamma_{\text{as}}(\text{bridge}), \delta_p(\text{bridge}), \gamma_s(\text{bridge})$                                  |
| 1143 |      |      | $\delta_p(\text{bridge})(45), \gamma_s(\text{bridge}), \gamma_{\text{as}}(\text{bridge}), \rho_b(\text{POH})$                                  |
| 1165 | 1161 | 1162 | $\rho_r(\text{CC}(\text{H})\text{C})_{\phi}(58), \delta_p(\text{bridge}), \gamma_s(\text{bridge})$                                             |
| 1165 |      |      | $\rho_r(\text{CC}(\text{H})\text{C})_{\phi}(45), \gamma_{\text{as}}(\text{bridge}), \gamma_s(\text{bridge}), \delta_p(\text{bridge})$          |
| 1171 |      |      | $\rho_r(\text{CC}(\text{H})\text{C})_{\phi\text{B}}(59), \rho_r(\text{C}_\text{L}\text{C}(\text{H})\text{C})_{\phi\text{B}}$                   |

|      |      |      |                                                                                                                                                                                                                                                                                |
|------|------|------|--------------------------------------------------------------------------------------------------------------------------------------------------------------------------------------------------------------------------------------------------------------------------------|
| 1171 | 1181 | 1177 | $\rho_r(\text{CC}(\text{H})\text{C})_{\phi\text{B}}(60), \rho_r(\text{C}_\text{L}\text{C}(\text{H})\text{C})_{\phi\text{B}}$                                                                                                                                                   |
| 1180 |      |      | $\gamma_{\text{as}}(\text{bridge})(55), \gamma_{\text{s}}(\text{bridge}), \delta_{\text{p}}(\text{bridge})$                                                                                                                                                                    |
| 1189 |      |      | $\delta_{\text{p}}(\text{bridge})(28), \gamma_{\text{s}}(\text{bridge}), \gamma_{\text{as}}(\text{bridge}), \nu(\text{C}_\text{L}\text{C}_\alpha)$                                                                                                                             |
| 1193 |      |      | $\gamma_{\text{as}}(\text{bridge})(53), \gamma_{\text{s}}(\text{bridge}), \delta_{\text{p}}(\text{bridge})$                                                                                                                                                                    |
| 1193 |      |      | $\rho_r(\text{C}_\text{L}\text{C}(\text{H})\text{C})_{\phi}(26), \rho_r(\text{CC}(\text{H})\text{C})_{\phi}, \delta_{\text{p}}(\text{bridge})$                                                                                                                                 |
| 1194 | 1188 | 1189 | $\rho_r(\text{C}_\text{L}\text{C}(\text{H})\text{C})_{\phi}(34), \rho_r(\text{CC}(\text{H})\text{C})_{\phi}$                                                                                                                                                                   |
| 1216 |      | 1206 | $\nu(\text{P}=\text{O})(16), \rho_r(\text{C}_\text{L}\text{C}_\alpha(\text{H})\text{P}), \rho_r(\text{C}_\alpha(\text{H},\text{P})\text{N}),$<br>$\rho_r(\text{C}_\text{L}\text{C}_\alpha(\text{H},\text{P})\text{N})$                                                         |
| 1220 |      |      | $\delta_{\text{p}}(\text{bridge})(44), \gamma_{\text{s}}(\text{bridge}), \gamma_{\text{as}}(\text{bridge})$                                                                                                                                                                    |
| 1225 |      |      | $\delta_{\text{p}}(\text{bridge})(51), \gamma_{\text{s}}(\text{bridge}), \gamma_{\text{as}}(\text{bridge})$                                                                                                                                                                    |
| 1234 |      | 1227 | $\nu(\text{P}=\text{O})(46), \rho_r(\text{C}_\text{L}\text{C}_\alpha(\text{H})\text{P}), \rho_r(\text{C}_\alpha(\text{H},\text{P})\text{N}),$<br>$\rho_r(\text{C}_\text{L}\text{C}_\alpha(\text{H},\text{P})\text{N})$                                                         |
| 1244 | 1242 |      | $\delta_{\text{p}}(\text{bridge})(36), \gamma_{\text{s}}(\text{bridge}), \nu(\text{P}=\text{O}), \gamma_{\text{as}}(\text{bridge})$                                                                                                                                            |
| 1253 |      |      | $\gamma_{\text{as}}(\text{bridge})(31), \gamma_{\text{s}}(\text{bridge}), \delta_{\text{p}}(\text{bridge})$                                                                                                                                                                    |
| 1255 |      |      | $\delta_{\text{p}}(\text{bridge})(48), \gamma_{\text{s}}(\text{bridge}), \gamma_{\text{as}}(\text{bridge})$                                                                                                                                                                    |
| 1271 |      | 1264 | $\delta_{\text{p}}(\text{bridge})(42), \gamma_{\text{s}}(\text{bridge}), \gamma_{\text{as}}(\text{bridge})$                                                                                                                                                                    |
| 1271 |      |      | $\gamma_{\text{as}}(\text{bridge})(19), \gamma_{\text{s}}(\text{bridge}), \rho_r(\text{C}_\alpha(\text{H},\text{P})\text{N}), \rho_r(\text{C}_\text{L}\text{C}_\alpha(\text{H},\text{P})\text{N})$                                                                             |
| 1286 |      | 1285 | $\delta_{\text{p}}(\text{bridge})(39), \gamma_{\text{s}}(\text{bridge}), \gamma_{\text{as}}(\text{bridge})$                                                                                                                                                                    |
| 1286 |      |      | $\gamma_{\text{as}}(\text{bridge})(14), \nu(\text{C}_\text{L}\text{C}_{\text{B}(\text{OH})_2})_{\phi\text{B}}, \gamma_{\text{s}}(\text{bridge}), \rho_r(\text{C}_\text{L}\text{C}_\alpha(\text{H},\text{P})\text{N}),$<br>$\rho_r(\text{C}_\alpha(\text{H},\text{P})\text{N})$ |
| 1317 |      |      | $\delta_{\text{p}}(\text{bridge})(49), \gamma_{\text{s}}(\text{bridge}), \gamma_{\text{as}}(\text{bridge})$                                                                                                                                                                    |
| 1321 |      |      | $\gamma_{\text{as}}(\text{bridge})(14), \nu(\text{C}_\text{L}\text{C})_{\phi}, \gamma_{\text{s}}(\text{bridge})$                                                                                                                                                               |

|      |      |      |                                                                                                                                                                                                                                                                                           |
|------|------|------|-------------------------------------------------------------------------------------------------------------------------------------------------------------------------------------------------------------------------------------------------------------------------------------------|
| 1321 |      |      | $\delta_{\text{p(bridge)}}(\mathbf{35}), \gamma_{\text{s(bridge)}}, \gamma_{\text{as(bridge)}}$                                                                                                                                                                                           |
| 1338 |      |      | $\rho_{\text{r}}(\text{C}_{\text{L}}\text{C}_{\alpha}(\text{H},\text{P})\text{N})(20), \gamma_{\text{as(bridge)}}, \gamma_{\text{s(bridge)}}$                                                                                                                                             |
| 1339 |      |      | $\rho_{\text{r}}(\text{C}_{\text{L}}\text{C}_{\alpha}(\mathbf{H},\mathbf{P})\mathbf{N})(\mathbf{30}), \rho_{\text{r}}(\text{C}_{\text{L}}\text{C}_{\alpha}(\mathbf{H})\mathbf{P})$                                                                                                        |
| 1346 |      |      | $\gamma_{\text{as(bridge)}}(32), \gamma_{\text{s(bridge)}}, \rho_{\text{r}}(\text{C}_{\text{L}}\text{C}(\text{H})\text{C})_{\phi}, \delta_{\text{p(bridge)}}$                                                                                                                             |
| 1346 | 1330 | 1330 | $\delta_{\text{p(bridge)}}(\mathbf{26}), \gamma_{\text{s(bridge)}}, \rho_{\text{r}}(\text{C}_{\text{L}}\text{C}(\mathbf{H})\mathbf{C})_{\phi}, \gamma_{\text{as(bridge)}}$                                                                                                                |
| 1349 |      | 1363 | $\gamma_{\text{as(bridge)}}(38), \gamma_{\text{s(bridge)}}, \nu(\text{BO}), \delta_{\text{p(bridge)}}$                                                                                                                                                                                    |
| 1363 |      |      | $\delta_{\text{p(bridge)}}(\mathbf{50}), \gamma_{\text{as(bridge)}}, \gamma_{\text{s(bridge)}}$                                                                                                                                                                                           |
| 1364 |      |      | $\gamma_{\text{as(bridge)}}(53), \gamma_{\text{s(bridge)}}, \delta_{\text{p(bridge)}}$                                                                                                                                                                                                    |
| 1446 | 1428 | 1428 | $\rho_{\text{r}}(\text{CC}(\mathbf{H})\mathbf{C})_{\phi}(\mathbf{36}), \nu(\text{CC})_{\phi}, \rho_{\text{r}}(\text{C}_{\alpha}\mathbf{N}(\mathbf{H})\mathbf{C}_{\text{L}})$                                                                                                              |
| 1449 |      |      | $\rho_{\text{r}}(\text{CC}(\text{H})\text{C})_{\phi}(40), \nu(\text{CC})_{\phi}, \rho_{\text{r}}(\text{C}_{\alpha}\text{N}(\text{H})\text{C}_{\text{L}})$                                                                                                                                 |
| 1450 |      |      | $\rho_{\text{r}}(\text{CC}(\text{H})\text{C})_{\phi\text{B}}(47), \nu(\text{C}_{\text{L}}\text{C})_{\phi\text{B}}, \nu(\text{CC})_{\phi\text{B}}$                                                                                                                                         |
| 1450 |      | 1450 | $\rho_{\text{r}}(\text{CC}(\text{H})\text{C})_{\phi\text{B}}(43), \nu(\text{CC})_{\phi\text{B}}, \nu(\text{C}_{\text{L}}\text{C})_{\phi\text{B}}$                                                                                                                                         |
| 1495 |      |      | $\rho_{\text{r}}(\text{C}_{\text{B}}(\text{OH})_2\text{C}(\text{H})\text{C})_{\phi\text{B}}(16), \rho_{\text{r}}(\text{C}_{\text{L}}\text{C}(\text{H})\text{C})_{\phi\text{B}}, \nu(\text{C}_{\text{L}}\text{C}_{\text{B}}(\text{OH})_2)_{\phi\text{B}},$<br>$\gamma_{\text{as(bridge)}}$ |
| 1496 |      |      | $\delta_{\text{p(bridge)}}(21), \rho_{\text{r}}(\text{C}_{\text{B}}(\text{OH})_2\text{C}(\text{H})\text{C})_{\phi\text{B}}, \rho_{\text{r}}(\text{C}_{\text{L}}\text{C}(\text{H})\text{C})_{\phi\text{B}}, \gamma_{\text{s(bridge)}},$<br>$\gamma_{\text{as(bridge)}}$                    |
| 1510 |      | 1495 | $\rho_{\text{r}}(\text{CC}(\mathbf{H})\mathbf{C})_{\phi}(\mathbf{28}), \rho_{\text{r}}(\text{C}_{\text{L}}\text{C}(\mathbf{H})\mathbf{C})_{\phi}, \nu(\text{CC})_{\phi}$                                                                                                                  |
| 1510 |      |      | $\rho_{\text{r}}(\text{CC}(\text{H})\text{C})_{\phi}(29), \rho_{\text{r}}(\text{C}_{\text{L}}\text{C}(\text{H})\text{C})_{\phi}, \nu(\text{CC})_{\phi}$                                                                                                                                   |
| 1519 | 1509 |      | $\rho_{\text{r}}(\text{C}_{\alpha}\mathbf{N}(\mathbf{H})\mathbf{C}_{\text{L}})(\mathbf{50})$                                                                                                                                                                                              |
| 1526 |      |      | $\rho_{\text{r}}(\text{C}_{\alpha}\text{N}(\text{H})\text{C}_{\text{L}})(56)$                                                                                                                                                                                                             |
| 1587 | 1588 | 1590 | $\nu(\text{CC})_{\phi\text{B}}(\mathbf{40}), \nu(\text{C}_{\text{L}}\text{C}_{\text{B}}(\text{OH})_2)_{\phi\text{B}}, \rho_{\text{r}}(\text{CC}(\mathbf{H})\mathbf{C})_{\phi\text{B}}$                                                                                                    |



|      |      |      |                                                                                                                                                                              |
|------|------|------|------------------------------------------------------------------------------------------------------------------------------------------------------------------------------|
| 1587 |      |      | $\nu(\text{CC})_{\phi\text{B}}(\mathbf{40}), \nu(\text{C}_\text{L}\text{C}_\text{B}(\text{OH})_2)_{\phi\text{B}}, \rho_\text{r}(\text{CC}(\text{H})\text{C})_{\phi\text{B}}$ |
| 1607 |      |      | $\nu(\text{CC})_{\phi}(\mathbf{33}), \nu(\text{C}_\text{L}\text{C})_{\phi}$                                                                                                  |
| 1607 |      |      | $\nu(\text{CC})_{\phi}(\mathbf{33}), \nu(\text{C}_\text{L}\text{C})_{\phi}$                                                                                                  |
| 1620 | 1606 | 1604 | $\nu(\text{CC})_{\phi\text{B}}(\mathbf{30}), \nu(\text{C}_\text{L}\text{C})_{\phi\text{B}}$                                                                                  |
| 1620 |      |      | $\nu(\text{CC})_{\phi\text{B}}(\mathbf{18}), \nu(\text{C}_\text{L}\text{C})_{\phi\text{B}}$                                                                                  |
| 1625 |      | 1635 | $\nu(\text{CC})_{\phi}(\mathbf{42}), \delta_\text{as}(\phi)$                                                                                                                 |
| 1625 |      |      | $\nu(\text{CC})_{\phi}(\mathbf{42}), \delta_\text{as}(\phi)$                                                                                                                 |
| 2938 | 2922 | 2924 | $\nu(\text{C}_\alpha\text{H})(\mathbf{99})$                                                                                                                                  |
| 2938 |      | 2957 | $\nu(\text{C}_\alpha\text{H})(\mathbf{99})$                                                                                                                                  |
| 3107 | 3056 | 3058 | $\nu(\text{CH})_{\phi\text{B}}(\mathbf{91})$                                                                                                                                 |
| 3107 |      |      | $\nu(\text{CH})_{\phi\text{B}}(\mathbf{91})$                                                                                                                                 |
| 3116 |      |      | $\nu(\text{CH})_{\phi\text{B}}(\mathbf{89})$                                                                                                                                 |
| 3116 |      |      | $\nu(\text{CH})_{\phi\text{B}}(\mathbf{89})$                                                                                                                                 |
| 3118 |      |      | $\nu(\text{CH})_{\phi}(\mathbf{97})$                                                                                                                                         |
| 3118 |      |      | $\nu(\text{CH})_{\phi}(\mathbf{97})$                                                                                                                                         |
| 3126 |      |      | $\nu(\text{CH})_{\phi}(\mathbf{98})$                                                                                                                                         |
| 3126 |      |      | $\nu(\text{CH})_{\phi}(\mathbf{98})$                                                                                                                                         |
| 3130 |      |      | $\nu(\text{CH})_{\phi\text{B}}(\mathbf{92})$                                                                                                                                 |
| 3130 |      |      | $\nu(\text{CH})_{\phi\text{B}}(\mathbf{92})$                                                                                                                                 |
| 3145 | 3069 |      | $\nu(\text{CH})_{\phi}(\mathbf{67}), \nu(\text{CH})_{\phi\text{B}}$                                                                                                          |

|      |      |                                                           |
|------|------|-----------------------------------------------------------|
| 3145 |      | <b>v(CH)<sub>φ</sub>(74), v(CH)<sub>φB</sub></b>          |
| 3145 |      | <b>v(CH)<sub>φB</sub>(75), v(CH)<sub>φ</sub></b>          |
| 3145 |      | <b>v(CH)<sub>φB</sub>(66), v(CH)<sub>φ</sub></b>          |
| 3177 |      | <b>v(CH)<sub>φ</sub>(97)</b>                              |
| 3177 |      | <b>v(CH)<sub>φ</sub>(97)</b>                              |
| 3180 |      | <b>v(CH)<sub>φ</sub>(97)</b>                              |
| 3180 |      | <b>v(CH)<sub>φ</sub>(97)</b>                              |
| 3398 |      | <b>v(NH)(96)</b>                                          |
| 3405 | 3482 | <b>v(NH)(96)</b>                                          |
| 3424 |      | <b>v(OH)<sub>POH</sub>(83), v(OH)<sub>BOHbridge</sub></b> |
| 3430 |      | <b>v(OH)<sub>POH</sub>(67), v(OH)<sub>BOHbridge</sub></b> |
| 3467 |      | <b>v(OH)<sub>BOHbridge</sub>(73), v(OH)<sub>POH</sub></b> |
| 3500 | 3503 | <b>v(OH)<sub>BOHbridge</sub>(83), v(OH)<sub>POH</sub></b> |
| 3778 |      | <b>v(OH)<sub>POH</sub>(100)</b>                           |
| 3778 |      | <b>v(OH)<sub>POH</sub>(100)</b>                           |
| 3791 |      | <b>v(OH)<sub>BOH</sub>(99)</b>                            |
| 3791 |      | <b>v(OH)<sub>BOH</sub>(98)</b>                            |

---

<sup>a</sup>Abbreviations: v, stretching; ρ<sub>r</sub>, rocking; δ, deformation; γ, torsion; p, puckering; δ<sub>trig</sub>, trigonal deformation; s, symmetric; as, antisymmetric; oop, out-of-plane vibrations; φ, aromatic ring; B, phenylboronic acid ring; bridge, hydrogen bonds [(HOBO)<sub>2</sub>]; C<sub>L</sub>, carbon atom of the aromatic ring connected to the aliphatic chain; C<sub>α</sub>, tetrahedral carbon atom; bold, vibrations related to band with Raman Intensity > 0.4 [%]
